# Supplementary material for: Direct assembly of tin–MWCNT 3D-networked anode for rechargeable lithium ion batteries
Source: Royal Society of Chemistry journal article supplement (doi:10.1039/c2ra00943a), 2012-01-01
Supplement: c2ra00943a.pdf [file c2ra00943a.pdf]

Supporting Information for

# Direct Assembly of Tin-MWCNT 3D-Networked Anode for rechargeable Lithium Ion Batteries

**Seung-Deok Seo, Gwang-Hee Lee, Ah-Hyeon Lim, Kyung-Mi Min, Jae-Chan Kim,  
Hyun-Woo Shim, Kyung-Soo Park, and Dong-Wan Kim\***

Department of Materials Science and Engineering, Ajou University, Suwon 443-749, Korea

---

[\*] To whom correspondence should be addressed. E-mail: [dwkim@ajou.ac.kr](mailto:dwkim@ajou.ac.kr)

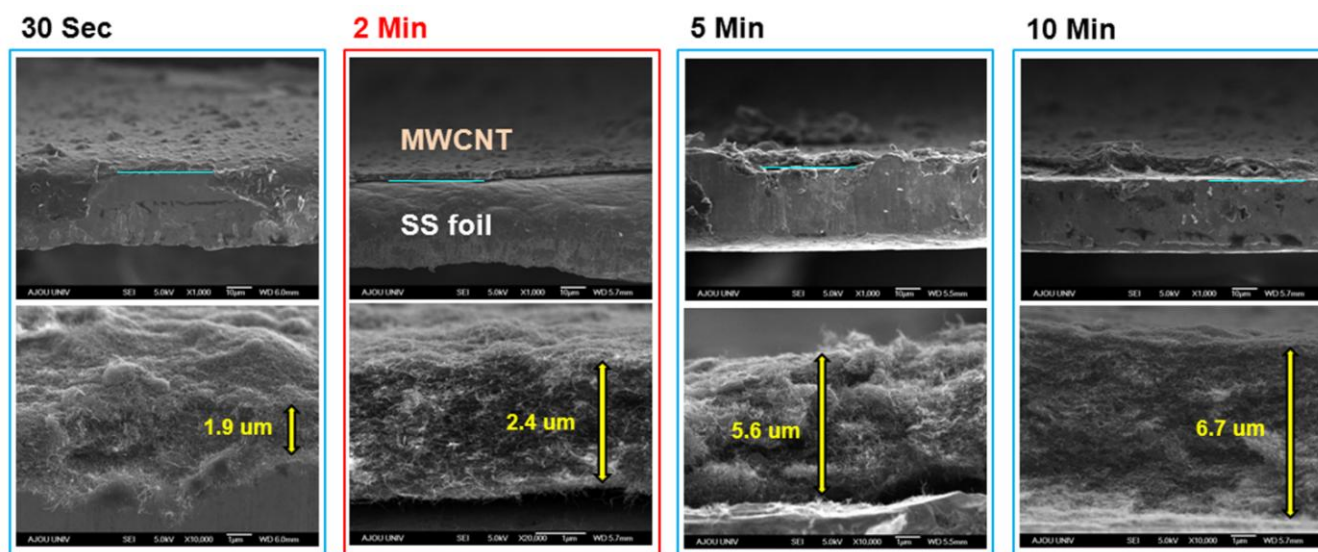

**Figure S1.** Cross-sectional SEM images of the MWCNT film obtained by electrophoretic deposition on a SS substrate as a function of deposition time.

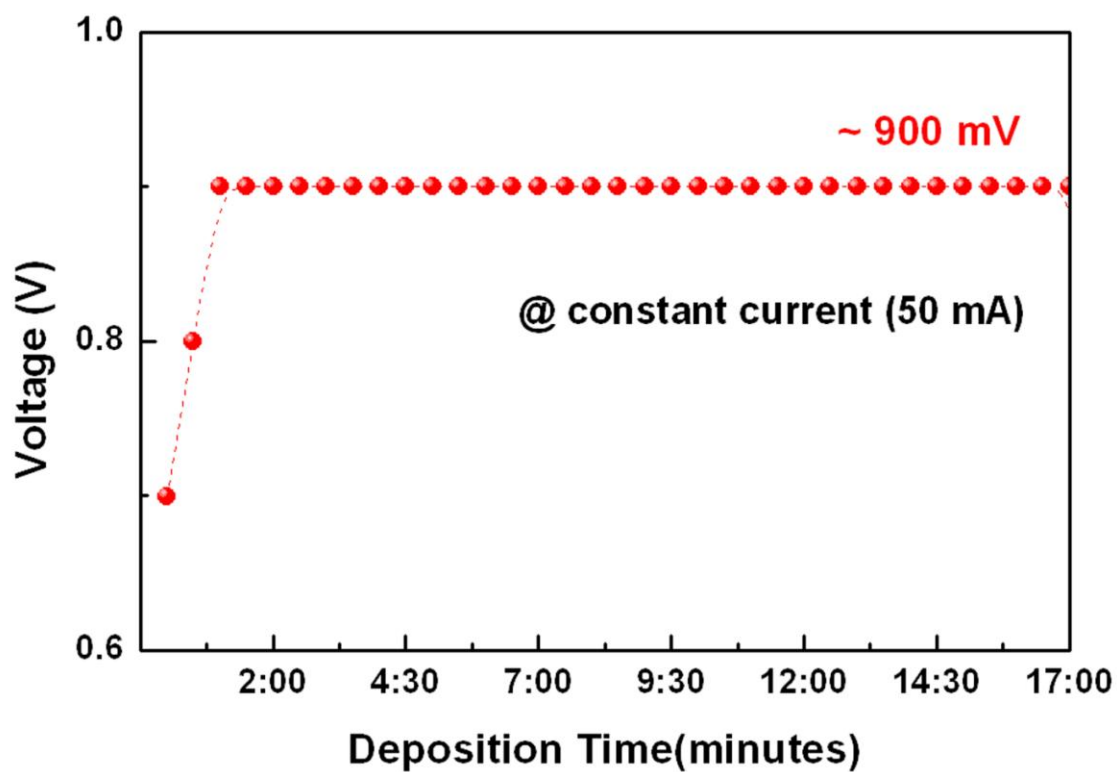

**Figure S2.** Voltage variation during the deposition of Sn as a function of deposition time under a constant current of 50 mA.

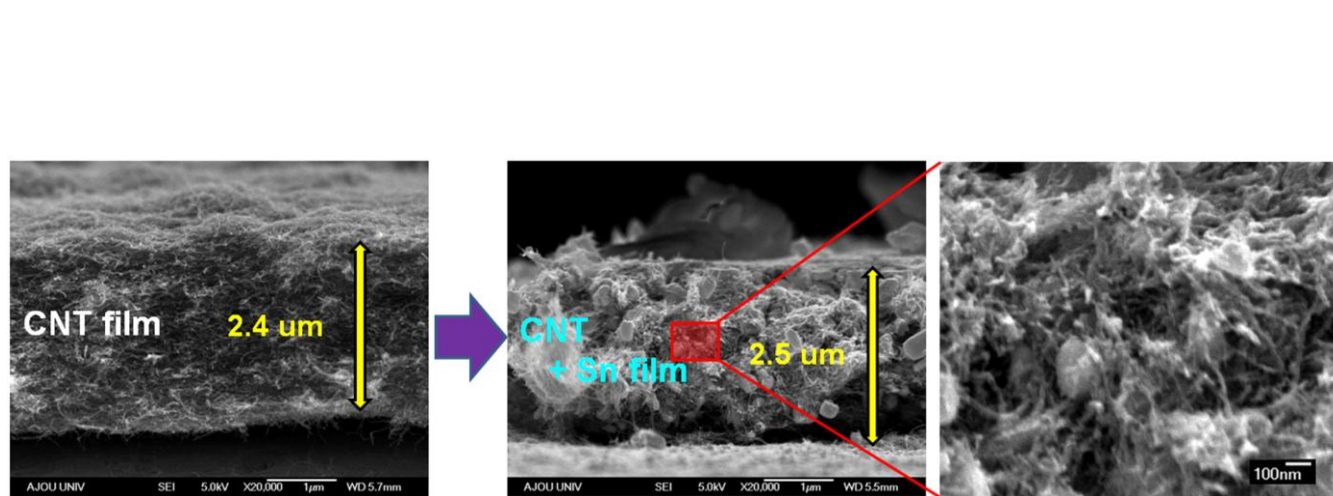

**Figure S3.** Cross-sectional SEM images of the MWCNT and Sn-MWCNT films (7 min deposition) on a SS substrate.

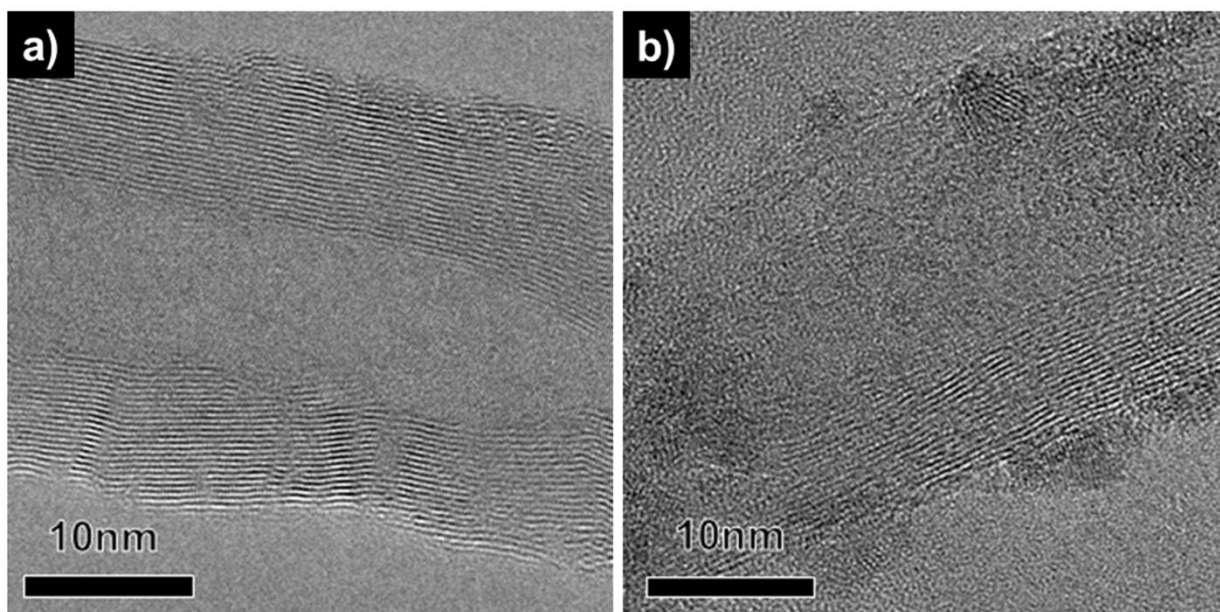

**Figure S4.** HRTEM images of (a) pristine MWCNTs and (b) the Sn-MWCNT nanocomposite deposited for 3 min.

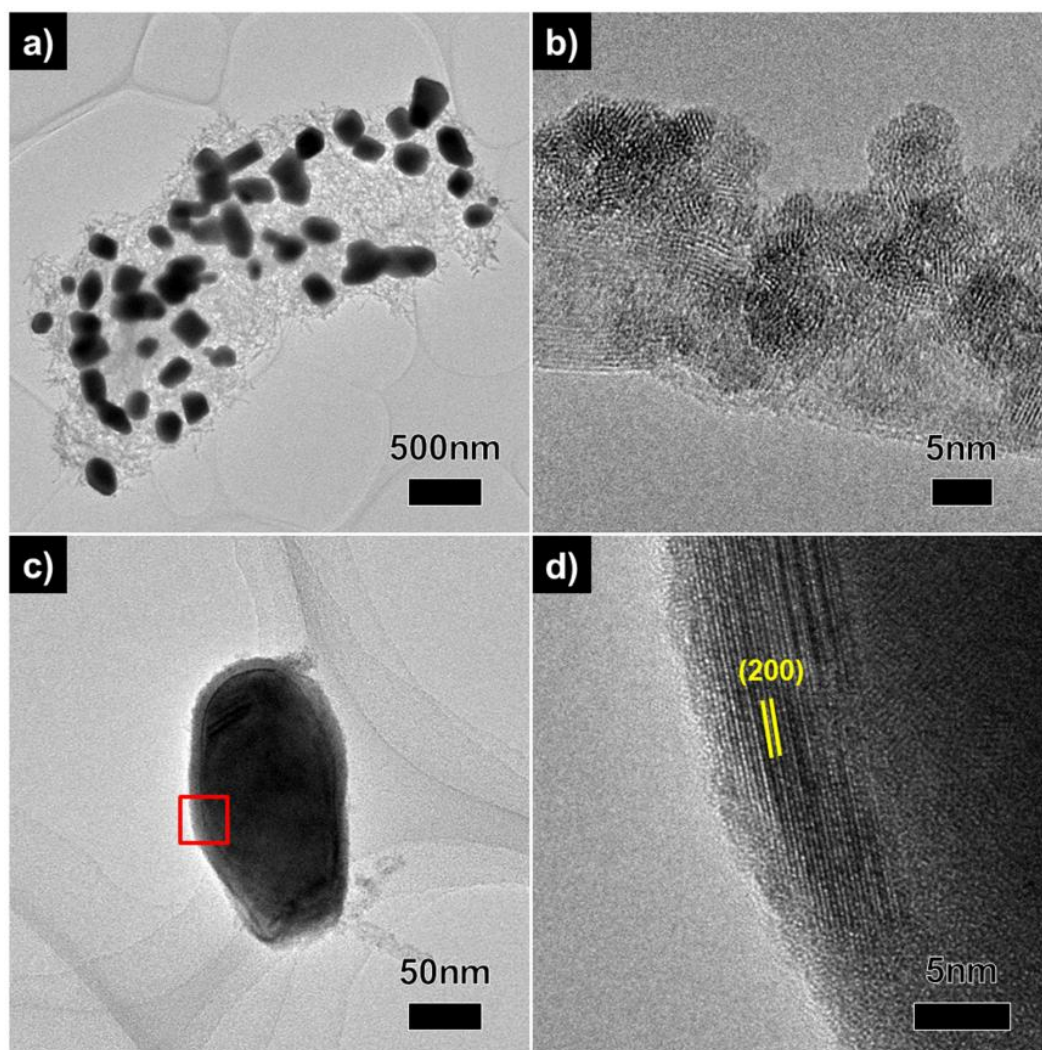

**Figure S5.** TEM image of the Sn-MWCNT nanocomposite film deposited for 10 min. (a, b) Low-magnification and high-magnification views and (c,d) low-magnification and high-magnification views of an isolated Sn nanoparticle.



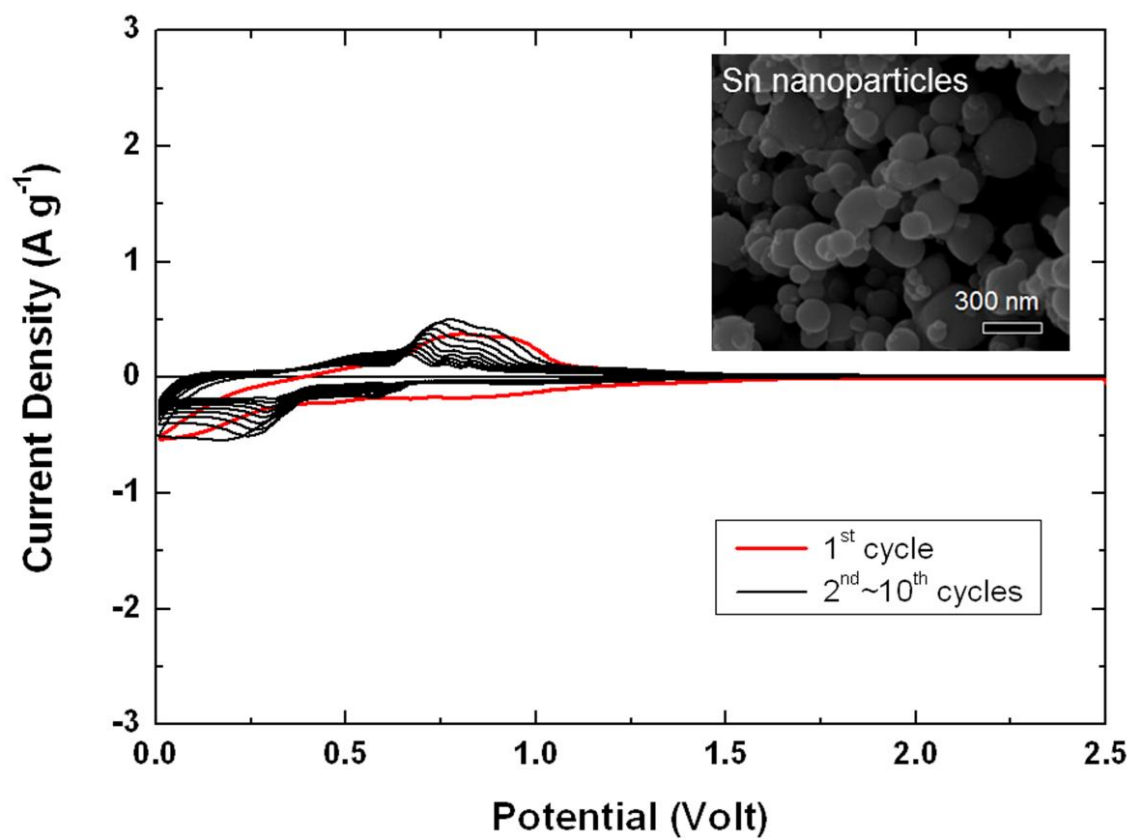

**Figure S6.** Cyclic voltammogram of commercial Sn nanoparticles.

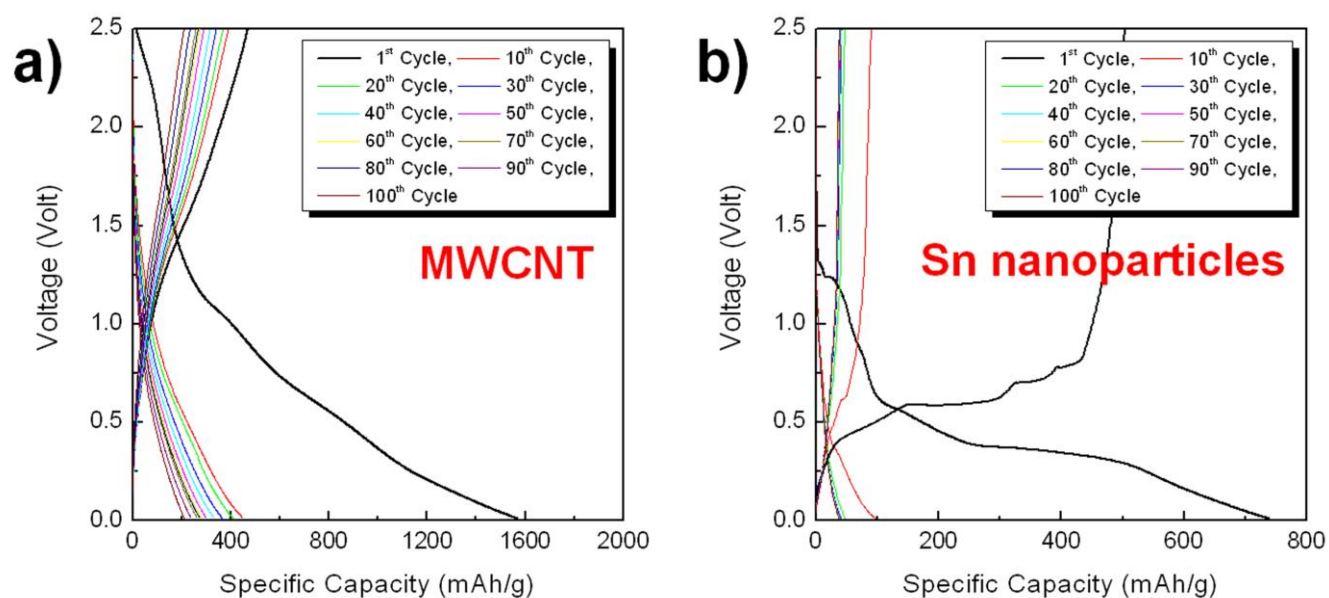

**Figure S7.** Galvanostatic voltage-specific capacity profiles of MWCNT and commercial Sn nanoparticle electrodes.



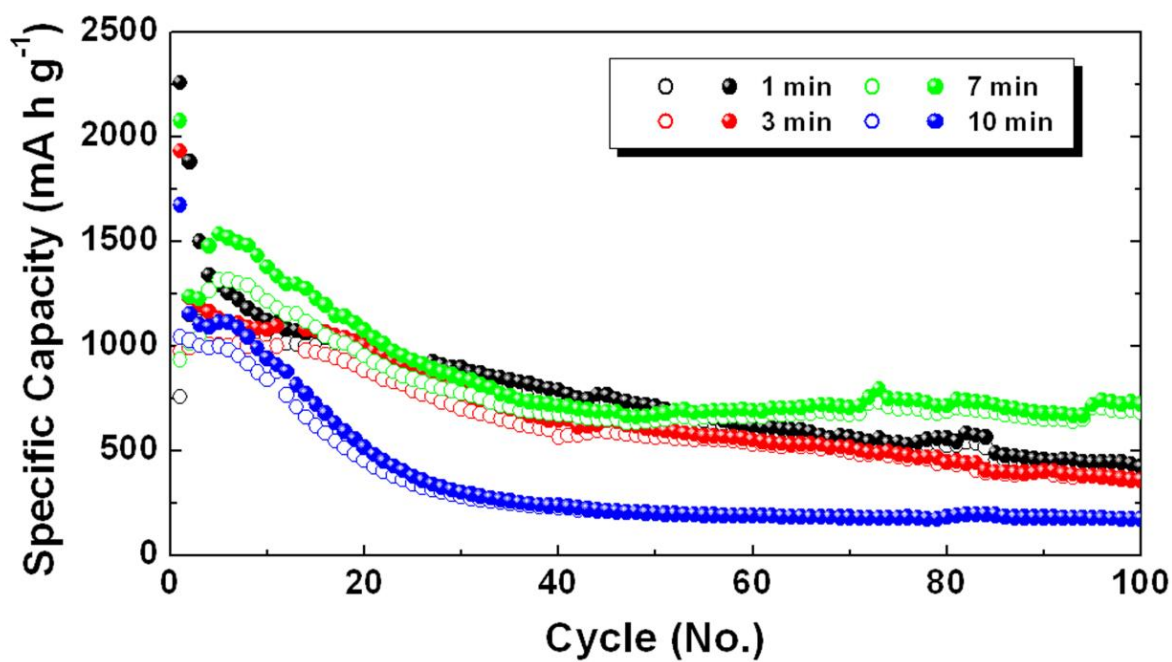

**Figure S8.** Cyclic performances of Sn-MWCNT nanocomposites deposited with the same current for different durations.
